# Supplementary material for: A physical entrapment method for the preparation of carbon nanotube reinforced macroporous adsorption resin with enhanced selective extraction performance
Source: Royal Society of Chemistry journal article supplement (doi:10.1039/c5nr05454k), 2015-01-01
Supplement: c5nr05454k1.pdf [file c5nr05454k1.pdf]

1 **Supporting Information**

2

3 **Physical Entrapment Method for the Preparation of Carbon**  
4 **Nanotubes Reinforced Macroporous Adsorption Resin with**  
5 **Enhanced Selective Extraction Performance**

6 *Wei Ha<sup>a</sup>, Xin-yue Song<sup>a,b</sup>, Juan Chen<sup>a</sup>, Yan-ping Shi<sup>a\*</sup>*

7 <sup>a</sup> Key Laboratory of Chemistry of Northwestern Plant Resources of CAS and Key  
8 Laboratory for Natural Medicine of Gansu Province, Lanzhou Institute of Chemical  
9 Physics, Chinese Academy of Sciences, Lanzhou 730000, P. R. China.

10 <sup>b</sup> University of Chinese Academy of Sciences, Beijing 100049, PR China

1 **Preparation of fluorescently-labeled CNT reinforced MAR.** FITC-CNT was  
2 prepared according to the literature with a simple modification,<sup>1</sup> and the synthesis  
3 routes of FITC-CNT were shown in supporting information (Scheme S1). In brief, 50  
4 mg of oxidized CNTs (obtained from our previous work) were dispersed in 20 mL  
5 anhydrous DMF by sonication, and then 10 mL of thionyl chloride were added  
6 dropwise. The mixed solution was stirred and refluxed for 24 hours. After evaporation  
7 of the excess thionyl chloride under vacuum, the product was mixed with 10 mL of  
8 hexamethylenediamine and heated under reflux for 48 hours. After removal of the  
9 solvents and hexamethylenediamine by suction filtration, the crude product was  
10 purified by washing with methanol thoroughly to remove the excess of  
11 hexamethylenediamine, which was monitored by TLC. The product was dried under  
12 vacuum to obtain amino group modified CNTs (CNT **1**).

13 10 mg of CNT **1** and 10 mg of FITC were dispersed in 5 mL anhydrous DMF. The  
14 resulting mixture was stirred at room temperature under dark overnight. The excess of  
15 FITC was removed by washing with methanol and diethyl ether thoroughly, which  
16 was monitored by TLC. The product of fluorescently-labeled CNTs (CNT **2**) was  
17 dried under vacuum and dark and obtained as a black solid.

18 The preparation process of fluorescently-labeled CNT reinforced MAR was the  
19 same as CNT reinforced MAR described in manuscript, in which fluorescently-  
20 labeled CNT was used instead of original CNT.

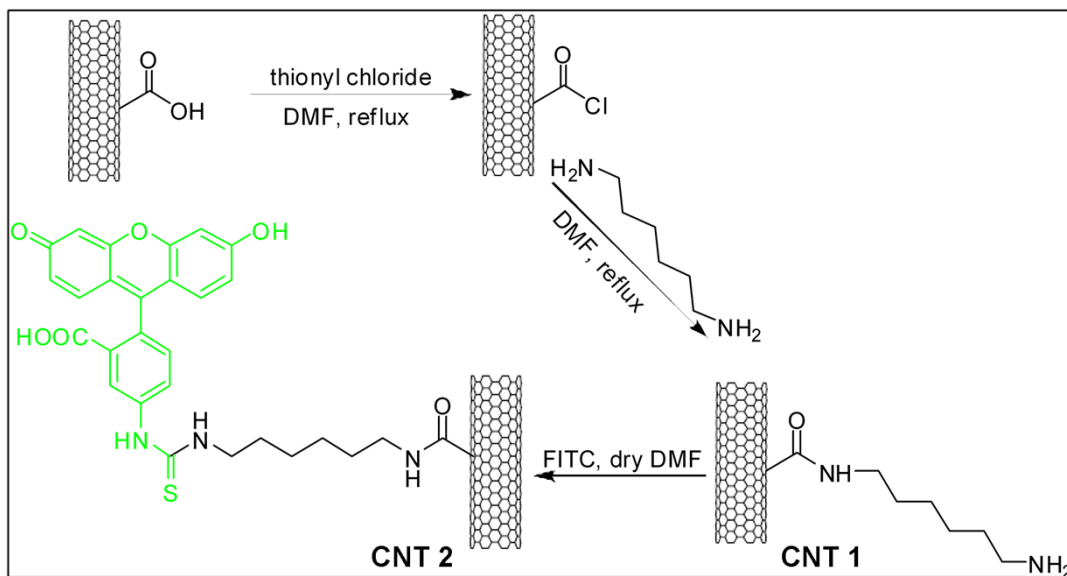

5 **Figure S1.** Synthesis route for the FITC-CNTs reinforced MAR.

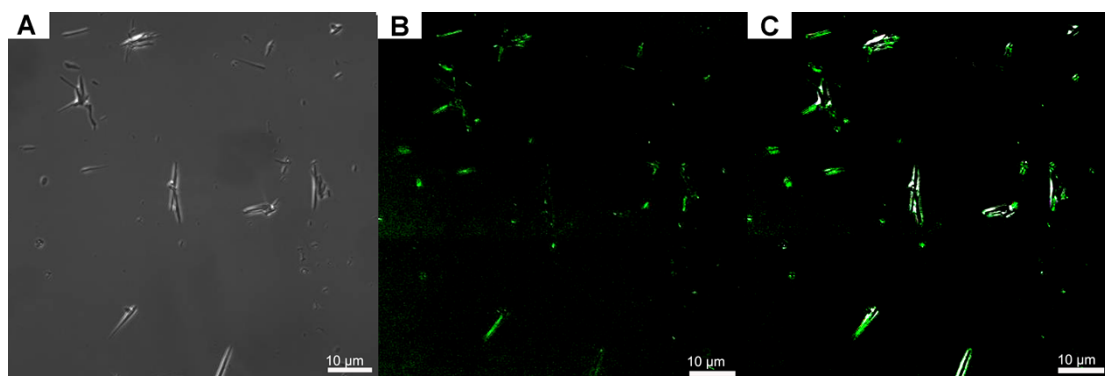

9 **Figure S2.** Bright field and fluorescent photographs of FITC-CNTs reinforced MAR.

10 Images from left to right show bright field, fluorescent photographs, and overlays of

11 two images.

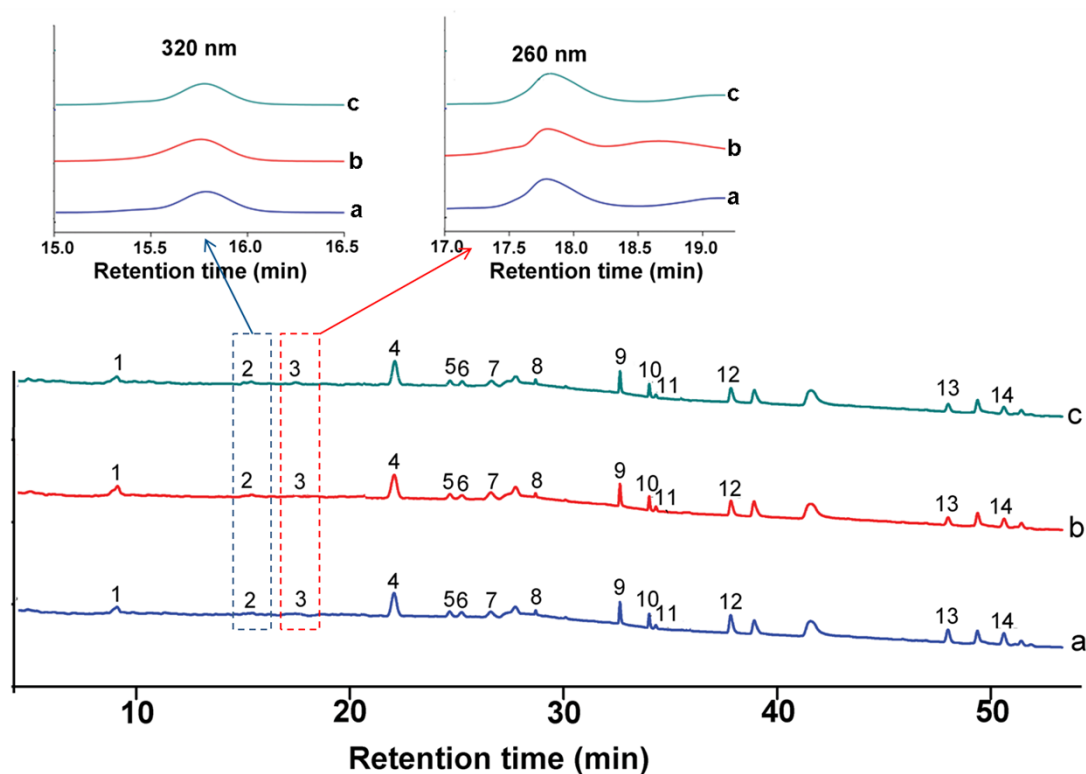

1

2 **Figure S3.** Chromatograms of a mixture of 14 reference standards before extraction (a)  
 3 and after extraction with MAR (b) or CNTs-MAR (c) at a detection wavelength of  
 4 230 nm. **1**, salidroside, **2**, caffeic acid, **3**, strychnine, **4**, paeoniflorin, **5**,  
 5 glucosylcimifugin, **6**, schaftoside, **7**, ferulic acid, **8**, rutin, **9**, luteolin, **10**, apigenin, **11**,  
 6 kaempferide, **12**, rhein, **13**, chrysophanol, **14**, physcion.

7

8

9

## 10 Reference

11 (1) Wu, W.; Li, R. T.; Bian, X. C.; Zhu, Z. S.; Ding, D.; Li, X. L.; Jia, Z. J.; Jiang, X.  
 12 Q.; Hu, Y. Q. *ACS Nano* **2009**, *3*, 2740-2750.
